# Supplementary material for: Examination of Novel Immunomodulatory Effects of L-Sulforaphane
Source: PubMed Central journal article supplement (PMC7917832; doi:10.3390/nu13020602), 2021-02-12
Supplement: nutrients-13-00602-s001.pdf [file nutrients-13-00602-s001.pdf]

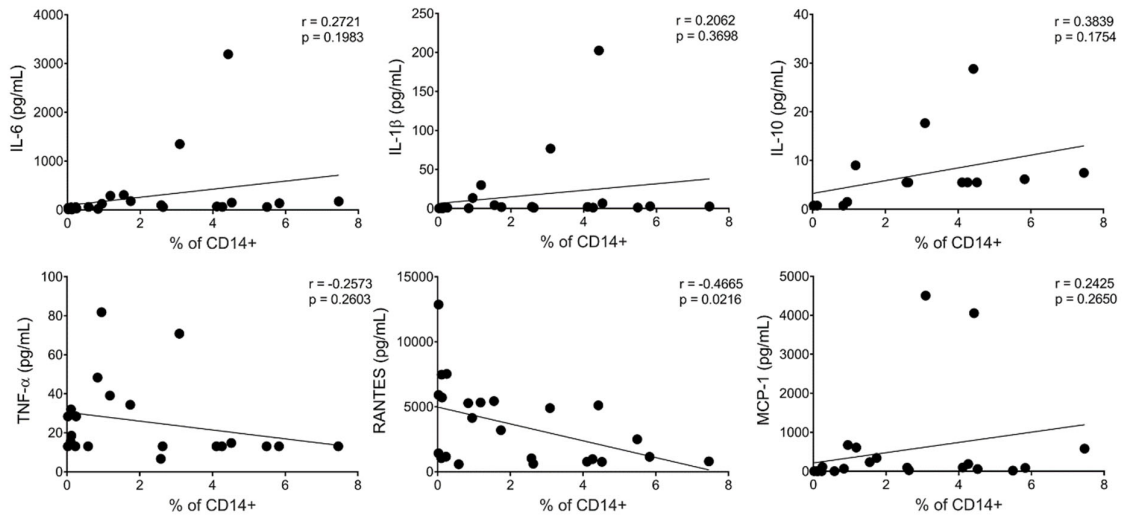

**Supplementary Figure S1.** Correlation between CD14<sup>+</sup> and cytokine/chemokine production after 24 h of LSF (10  $\mu$ M and 50  $\mu$ M) treatment. Each datapoint is an individual sample across each of the three groups ( $n = 8$ /group). A Pearson's correlation was performed. Abbreviation: CD, cluster of differentiation; IL, interleukin; LSF, L-sulforaphane; MCP-1, monocyte chemoattractant protein -1; RANTES, Regulated upon Activation, Normal T Cell Expressed and Presumably Secreted; TNF- $\alpha$ , tumour necrosis factor-alpha.
